# Supplementary material
Source: publisher site journal article supplement (https://www.dovepress.com/article/478426)
Supplement: Supplementary file 1 [file get_supplementary_file.php]

**Supporting Table S1. The RNA-SEQ databases information**

| GEO no. | Species | Strain | Platforms | Description |
| --- | --- | --- | --- | --- |
| GSE46408 | [Homo sapiens](https://www.ncbi.nlm.nih.gov/Taxonomy/Browser/wwwtax.cgi?mode=Info&id=9606) | primary | Agilent-014850 Whole Human Genome Microarray 4x44K G4112F | The tissues from 6 primary hepatocellular carcinomas and their corresponding nontumourous liver parenchyma |
| GSE146049 | [Homo sapiens](https://www.ncbi.nlm.nih.gov/Taxonomy/Browser/wwwtax.cgi?mode=Info&id=9606) | NASH to HCC | Illumina HumanHT-12 V4.0 expression beadchip | The tissues from 5 patients with HCC were included (3 male/ 2 female) from the tumor and from nontumorous tissue. |
| GSE50579 | [Homo sapiens](https://www.ncbi.nlm.nih.gov/Taxonomy/Browser/wwwtax.cgi?mode=Info&id=9606) | HBV/ HCV/ alcohol/  Cryptogenic/ genetic hemochromatosis/  Alpha-1 antitrypsin deficiency to HCC | Agilent-028004 SurePrint G3 Human GE 8x60K Microarray | The tissues from 10 normal tissue and 67 hepatocellular carcinoma(HBV (n=8), HCV (n=9), alcohol (n=10), cryptogenic (n=11), genetic hemochromatosis (n=3), Alpha-1 antitrypsin deficiency (n=2), HCC-Grad: G1-G3(n=24)) |
| GSE115018 | [Homo sapiens](https://www.ncbi.nlm.nih.gov/Taxonomy/Browser/wwwtax.cgi?mode=Info&id=9606) | primary | Agilent-067406 Human CBC lncRNA + mRNA microarray V4.0 | The tissues from 12 hepatocellular carcinomas and the para cancerous normal tissues of 2 cm away from the cancer tissue |
| GSE101685 | [Homo sapiens](https://www.ncbi.nlm.nih.gov/Taxonomy/Browser/wwwtax.cgi?mode=Info&id=9606) | primary | [HG-U133_Plus_2] Affymetrix Human Genome U133 Plus 2.0 Array | The tissues from 8 normal tissue and 24 hepatocellular carcinoma Taiwanese patients with stage T1, T3a, T3b |

**Supporting Table S2. 100 genes across five databases**

| **Number** | **Gene** | **Number** | **Gene** | **Number** | **Gene** | **Number** | **Gene** |
| --- | --- | --- | --- | --- | --- | --- | --- |
| 1 | AADAT | 26 | CYP2B6 | 51 | LPA | 76 | RAP2A |
| 2 | ANGPTL6 | 27 | DBH | 52 | LYVE1 | 77 | RCAN1 |
| 3 | ASPM | 28 | DLGAP5 | 53 | MARCO | 78 | RFWD2 |
| 4 | BAIAP2 | 29 | DTL | 54 | MCM6 | 79 | RFX5 |
| 5 | BPGM | 30 | ECM1 | 55 | MDK | 80 | RMI2 |
| 6 | CAP2 | 31 | EGR1 | 56 | MECOM | 81 | SHBG |
| 7 | CCDC34 | 32 | FAHD2A | 57 | MELK | 82 | SHMT1 |
| 8 | CCNB2 | 33 | FCN3 | 58 | MT1E | 83 | SMYD3 |
| 9 | CDC25C | 34 | FOXO1 | 59 | MT1F | 84 | STEAP3 |
| 10 | CDCA5 | 35 | GMNN | 60 | MT1G | 85 | STMN1 |
| 11 | CDK1 | 36 | GOLPH3L | 61 | MT1H | 86 | SUB1 |
| 12 | CDKN3 | 37 | GPC3 | 62 | MT1M | 87 | TARBP1 |
| 13 | CDT1 | 38 | GPSM2 | 63 | MT1X | 88 | TBC1D7 |
| 14 | CELSR3 | 39 | GSTZ1 | 64 | NPC1L1 | 89 | TMEM106C |
| 15 | CENPF | 40 | HAMP | 65 | NTF3 | 90 | TMEM38B |
| 16 | CENPM | 41 | HEY1 | 66 | NUSAP1 | 91 | TOP2A |
| 17 | CEP41 | 42 | HMMR | 67 | OIP5 | 92 | TRMT12 |
| 18 | CLEC1B | 43 | ID2 | 68 | OIT3 | 93 | TSEN15 |
| 19 | CLEC4G | 44 | IGFALS | 69 | PBK | 94 | TTF2 |
| 20 | CNDP1 | 45 | IL1RAP | 70 | PEA15 | 95 | UBAP2L |
| 21 | CRHBP | 46 | ITGA6 | 71 | PLVAP | 96 | UBE2T |
| 22 | CSRNP1 | 47 | ITIH4 | 72 | PRC1 | 97 | UHRF1 |
| 23 | CXCL14 | 48 | ITLN1 | 73 | PTH1R | 98 | VIPR1 |
| 24 | CXCL2 | 49 | KLHL12 | 74 | PTTG1 | 99 | ZNF322 |
| 25 | CYP26A1 | 50 | LCAT | 75 | RACGAP1 | 100 | ZWINT |

|  | GSE101685 | | GSE50579 | | GSE115018 | | GSE46408 | | GSE146049 | | Expression |
| --- | --- | --- | --- | --- | --- | --- | --- | --- | --- | --- | --- |
| Gene name | adj.P.Val | logFC | adj.P.Val | logFC | adj.P.Val | logFC | adj.P.Val | logFC | adj.P.Val | logFC | up |
| ASPM | 0.000000000126 | 4.5729801 | 0.00333 | 2.2766044 | 0.0000238 | 3.27789183 | 0.0002444 | 4.857997 | 0.00120227 | 1.7 | up |
| CDKN3 | 0.000000201 | 3.5667717 | 0.00186 | 2.9423859 | 0.0000601 | 3.31142601 | 0.0000833 | 5.283524 | 0.00279753 | 1.3 | up |
| DTL | 0.0000000360 | 4.0260034 | 0.00320 | 2.6345474 | 0.000169 | 3.26187693 | 0.0019088 | 3.1315203 | 0.00736053 | 0.868 | up |
| CCNB2 | 0.0000000179 | 3.1286988 | 0.000112 | 3.7015563 | 0.000772 | 2.73422702 | 0.0002338 | 4.3422688 | 0.00473754 | 1.09 | up |
| ZWINT | 0.00000000210 | 3.7323006 | 0.0199 | 1.7153335 | 0.000596 | 2.55982104 | 0.0034964 | 3.3807027 | 0.01647617 | 0.713 | up |
| RACGAP1 | 0.0000000194 | 3.5723467 | 0.000375 | 2.2193912 | 0.000569 | 2.52630236 | 0.0013843 | 3.9029779 | 0.00393227 | 0.963 | up |
| PBK | 0.000000298 | 3.979068 | 0.00462 | 2.7034982 | 0.000154 | 2.63826791 | 0.0006155 | 5.2251072 | 0.00228278 | 0.635 | up |
| HMMR | 0.000000334 | 3.6010453 | 0.00106 | 2.6127262 | 0.000109 | 3.09277396 | 0.0006737 | 3.8367202 | 0.00166691 | 1.2 | up |
| TOP2A | 0.0000000000473 | 4.7443196 | 0.0466 | 2.2054571 | 0.0000507 | 3.66710731 | 0.0003012 | 5.5304897 | 0.00216994 | 1.85 | up |
| NUSAP1 | 0.0000333 | 2.9997824 | 0.0123 | 1.6272244 | 0.013 | 1.50213219 | 0.0027817 | 2.9633817 | 0.00161794 | 1.48 | up |
| CDK1 | 0.00000000155 | 3.3834163 | 0.00301 | 2.7858543 | 0.000369 | 2.96539516 | 0.0002338 | 4.9943732 | 0.0053674 | 1.02 | up |
| DLGAP5 | 0.00000000918 | 3.442391 | 0.0135 | 2.3372414 | 0.000155 | 1.97617579 | 0.0003012 | 5.0737187 | 0.00808636 | 0.75 | up |

**Supporting Table S3. The list of 12 core genes in indicated GSE data**

**Supporting Figure S1.Expression of key genes in CHOL from TCGA
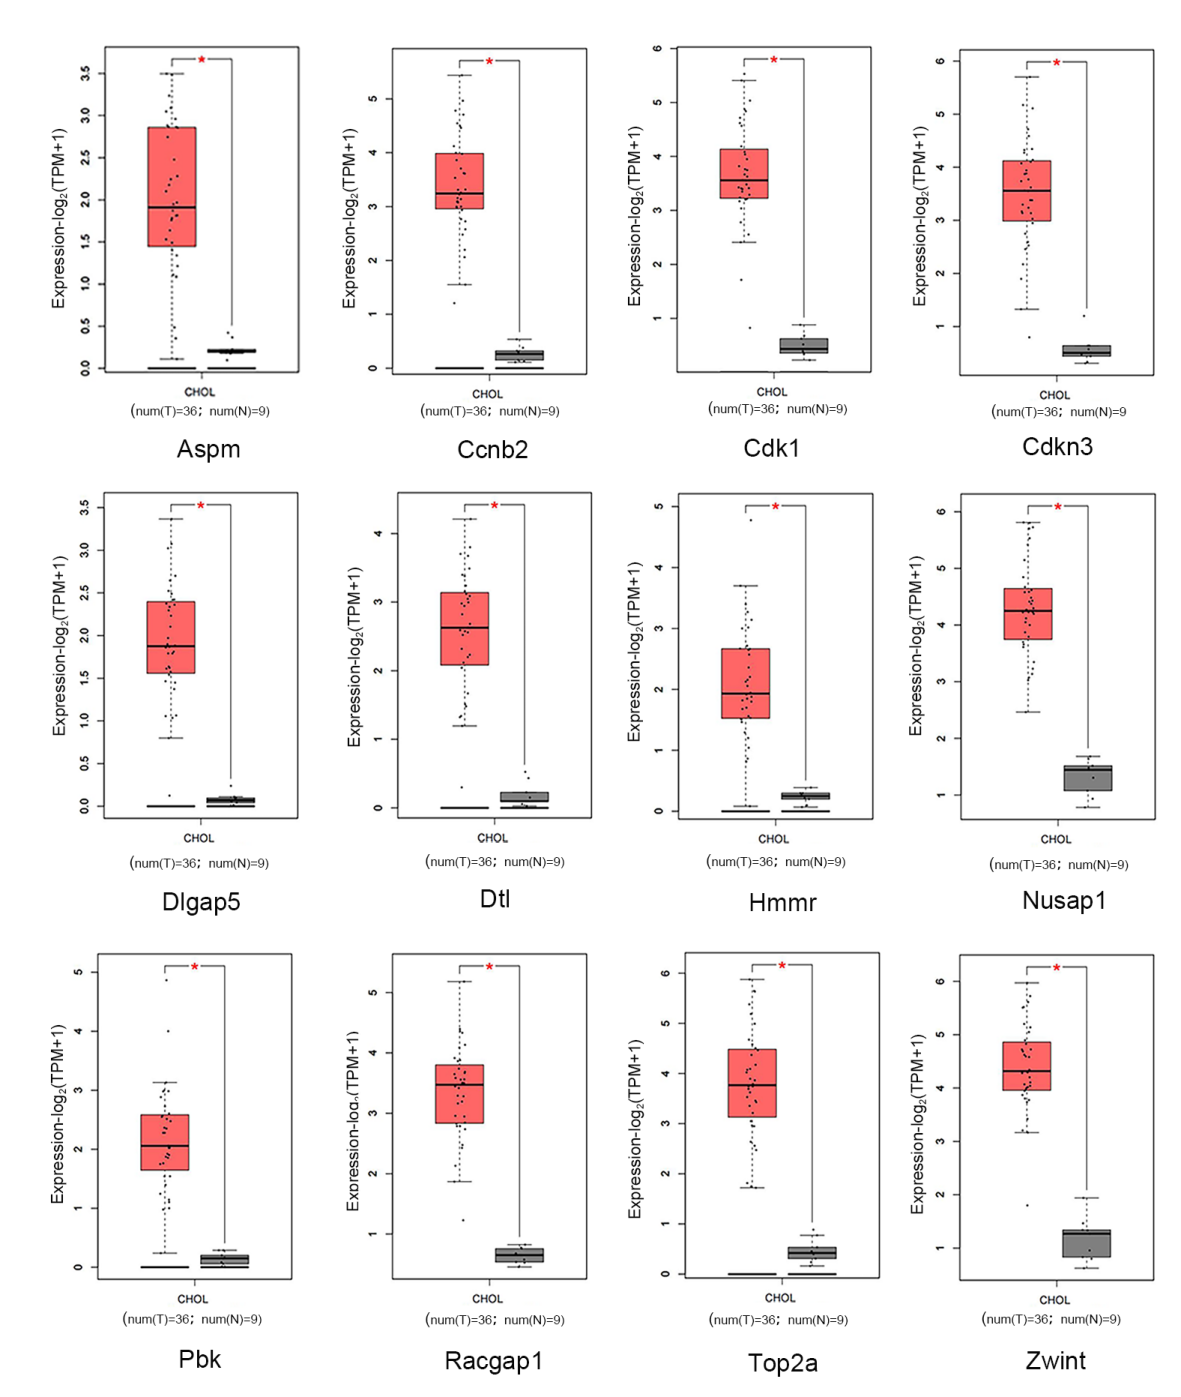
**

mRNA expression analysis of *Aspm, Ccnb2, Cdk1, Cdkn3, Dlgap5, Dtl, Hmmr, Nusap1, Pbk, Racgap1, Top2a, Zwint* in CHOL from TCGA. Red represents tumor tissue, and gray represents normal tissue. **P*<0.01.

**Supporting Figure S2.Expression of CDK1 and DLGAP5**

**
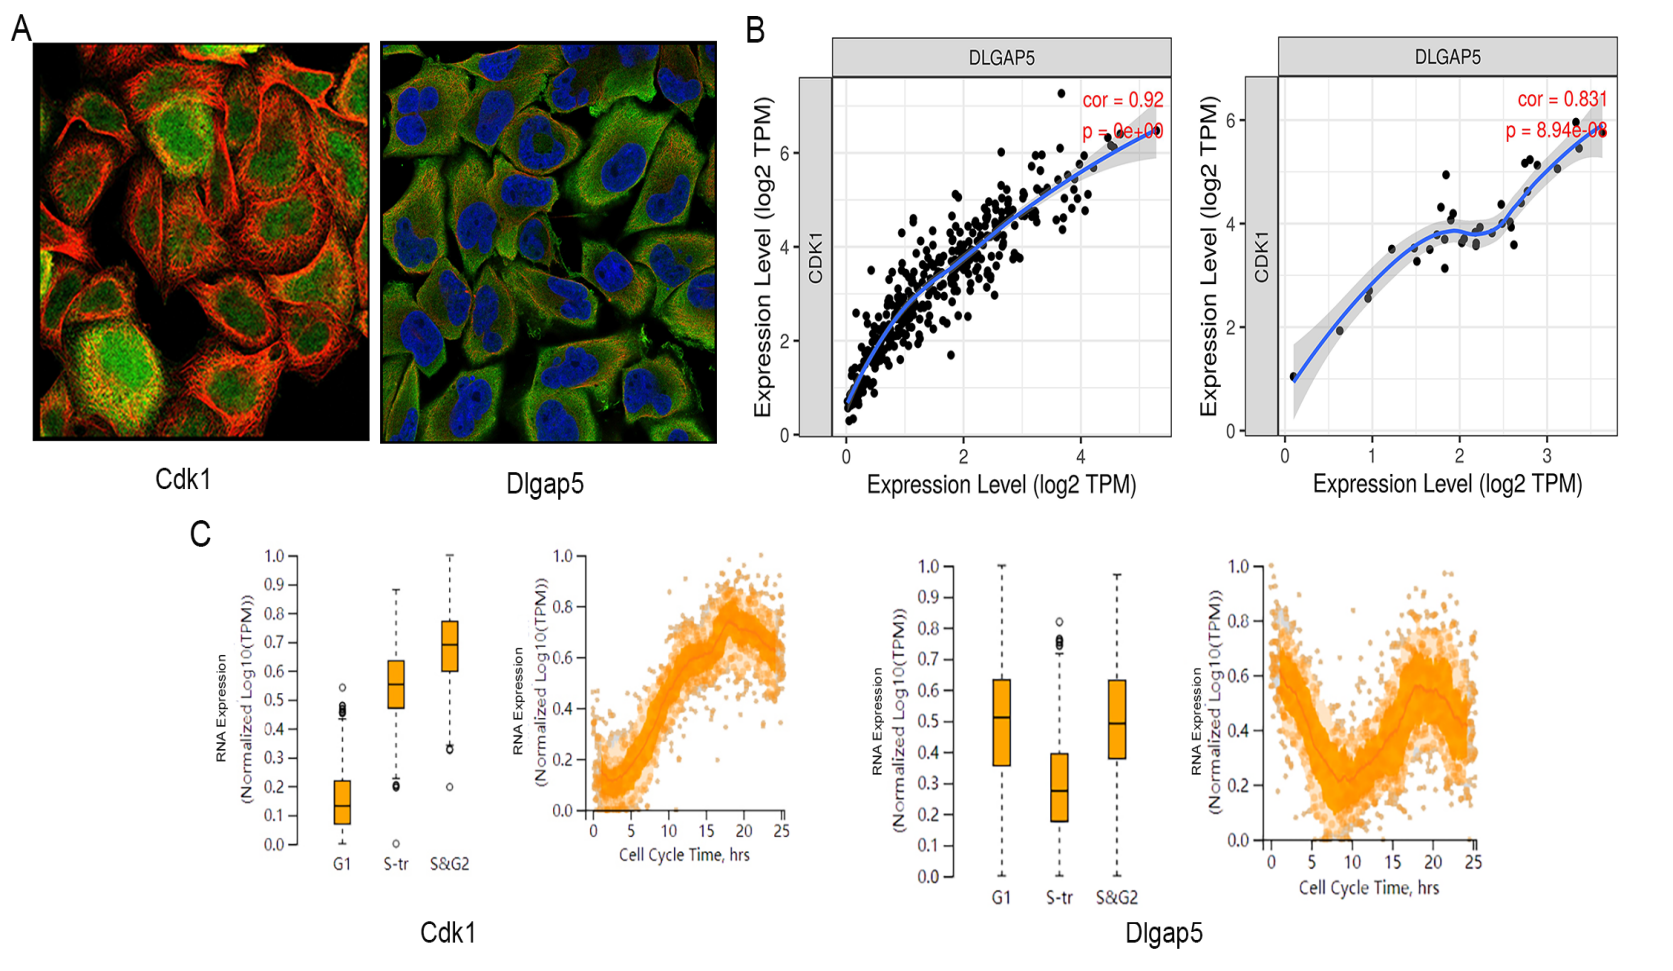
**

**(A)** Immunofluorescence staining of CDK1 and DLGAP5 in liver cancer. Nuclei, blue; microtubules, red; target protein, green. **(B)** Relative expression of CDK1 and DLGAP5 in LICH and CHOL. **(C)** RNA expression of CDK1 and DLGAP5 in different time of cell cycle.
